# Supplementary material for: A smartphone-based gold nanoparticle colorimetric sensing platform for kanamycin detection in food samples
Source: Royal Society of Chemistry journal article supplement (doi:10.1039/d3ay01076g), 2023-01-01
Supplement: d3ay01076g1.pdf [file d3ay01076g1.pdf]

## Supporting Information (SI)

### **Smartphone-based gold nanoparticles colorimetric sensing platform for kanamycin detection in food samples**

Ziyan Yu,<sup>1</sup># Yaxiao Liao,<sup>1</sup># Jie Liu,<sup>1</sup> Qin Wu,<sup>1</sup> Yu Cheng,<sup>1</sup> and Ke Huang\*<sup>1</sup>

*<sup>1</sup> Key Laboratory of Land Resources Evaluation and Monitoring in Southwest, Ministry of Education, College of Chemistry and Material Science, Sichuan Normal University, Chengdu, Sichuan, 610068, China*

\*Corresponding authors. E-mails: huangke@sicnu.edu.cn;

# Ziyan Yu and Yaxiao Liao contributed equally to this work.

## Chemical and reagents

All reagents used in this assay were analytical reagent grade. High purity NaCl, KCl, MgCl<sub>2</sub>, Na<sub>2</sub>HPO<sub>4</sub>, KH<sub>2</sub>PO<sub>4</sub>, acetic acid (CH<sub>3</sub>COOH), trisodium citrate dihydrate (C<sub>6</sub>H<sub>5</sub>Na<sub>3</sub>O<sub>7</sub>·2H<sub>2</sub>O), and ethyl acetate (C<sub>4</sub>H<sub>8</sub>O<sub>2</sub>) were purchased from Kelong Chemical Reagents (Chengdu, China). Gold chloride hydrate (HAuCl<sub>4</sub>·3H<sub>2</sub>O) and trichloroacetic acid (C<sub>2</sub>HCl<sub>3</sub>O<sub>2</sub>) were obtained from Aladdin Reagent Co. (Shanghai, China). Kanamycin solution, tetracycline, ampicillin trihydrate, tobramycin, gentamycin sulfate, chloramphenicol, chlortetracycline and Tris-HCl solution were ordered from Macklin Biochemical Co., Ltd (Shanghai, China).

The kanamycin aptamer:

CCCCATAACAAGAAAGCCAAACCTCTTGTTATGGGGGTTGAGGCTAAGC

CGA was synthesized by Sangon Biotech Co., Ltd (Shanghai, China). Syringe filters were obtained from Tianjin Jinteng experimental equipment Co., Ltd. (Tianjin, China). Tris-HCl solution (10 mM Tris-HCl, 50 mM NaCl, 5 mM KCl, 5 mM MgCl<sub>2</sub>, pH 7.4) was used as a working buffer. Water used in all experiments was purified by a water purification system (Chengdu Ultrapure Technology Co., Ltd. Chengdu, China) with a resistivity of 18.25 MΩ·cm. All solutions were stored at 4 °C in a refrigerator until use. The milk, honey, Vitamin C effervescent, vegetable, and meat were purchased from the local supermarket (Chengdu, China).

## Instruments

Transmission electron microscope (TEM) imaging was performed on an FEI Tecnai F20 microscope. The UV-visible absorption was recorded with a T2602 II UV-visible

spectrophotometer (Shanghai, China). Photographs of the experimental results were taken and analyzed by Honor 20s.

### **Preparation of kanamycin aptamer**

The untreated aptamer centrifuge tube was centrifuged for 10 min at 4000 rpm. Then add 97  $\mu\text{L}$  of purified water to the centrifuge tube to prepare a 100  $\mu\text{M}$  aptamer solution. Finally, the solution was diluted to 6  $\mu\text{M}$  and was then refrigerated at 4  $^{\circ}\text{C}$  before use.

### **Preparation of AuNPs**

The process involved heating  $\text{HAuCl}_4$  (1 mM, 100 mL) to boiling under vigorous stirring. Trisodium citrate (38.8 mM, 10 mL) was then rapidly added to the boiling solution, resulting in a color change from pale yellow to dark red within 2 minutes. The mixture underwent reflux for an additional 20 minutes and was stirred while being progressively brought to room temperature. It was then refrigerated at 4 $^{\circ}\text{C}$  until further use.

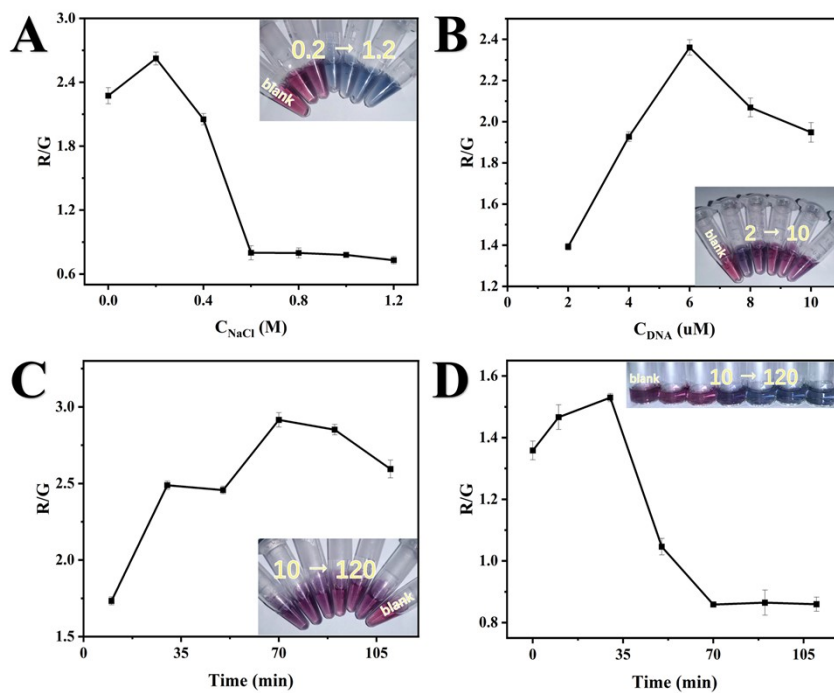

**Figure. S1** (A) Optimization of the concentration of NaCl. (B) Optimization of the concentration of aptamer (C) Optimization of the incubation time of aptamer. (D) Optimization of the incubation time of Kana.

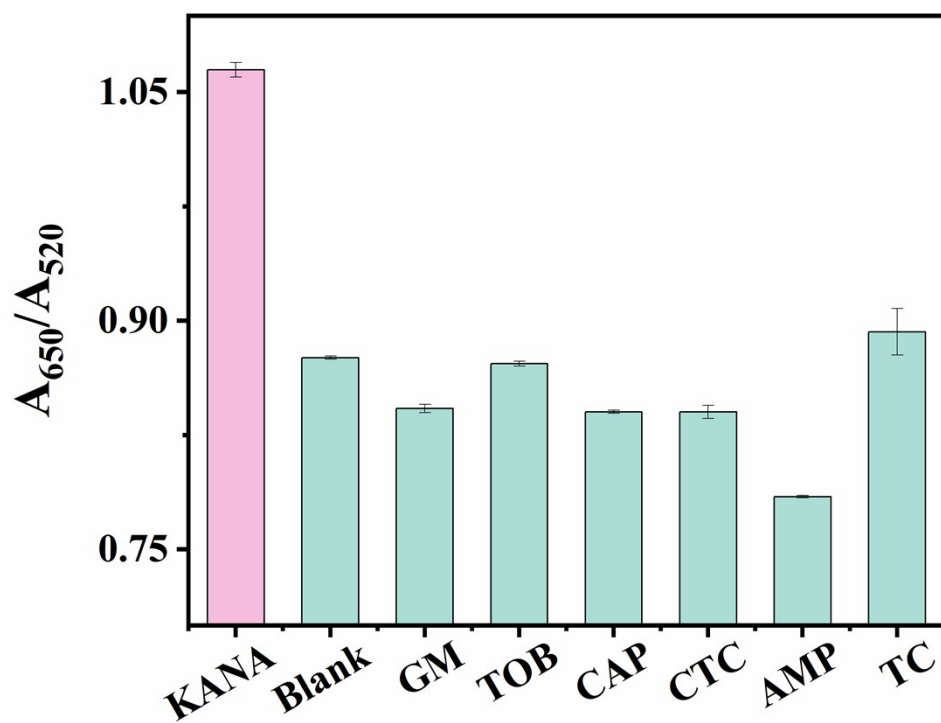

**Figure. S2** Selectivity of the aptasensor for Kana detection in aqueous solution. The concentration of all substances was 3 nM.
